# Supplementary material for: A Novel Dual-Function Nitric Oxide Donor Therapy for Preeclampsia—A Proof-of-Principle Study in a Murine Model
Source: MDPI journal article supplement (doi:10.3390/antiox12122036), 2023-11-23
Supplement: s1 [file s1]

Supplemental Figure S1.

### Mean Blood Pressure in Non-Pregnant mice

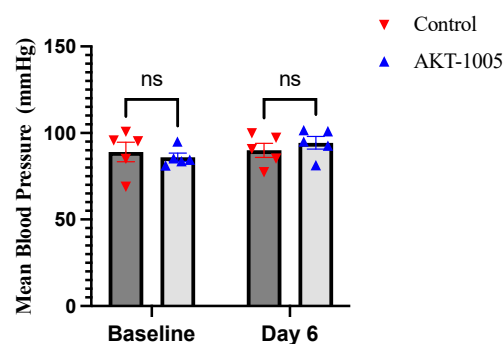

(a)

### Mean Blood Pressure in Pregnant mice

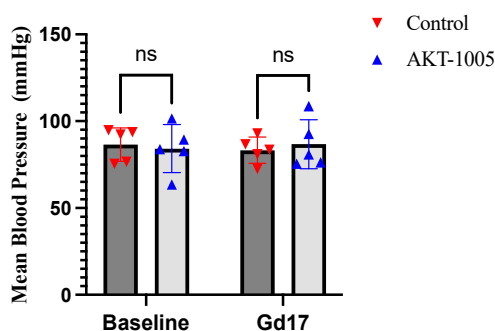

(b)

**Figure S1. AKT-1005 does not alter blood pressure in normotensive pregnant or non-pregnant mice.** Mice were treated with AKT-1005 via minipumps @20 mg/kg dose for 6 days and mean blood pressure was measured at baseline and at day 6 in non-pregnant mice (SuppF1a) and at gd 0 and Gd17 in pregnant mice (SuppF1b) (Two-way repeated-measures ANOVA. Mean  $\pm$  SEM, n=6, ns=non-significant.)

Supplemental Figure S2.

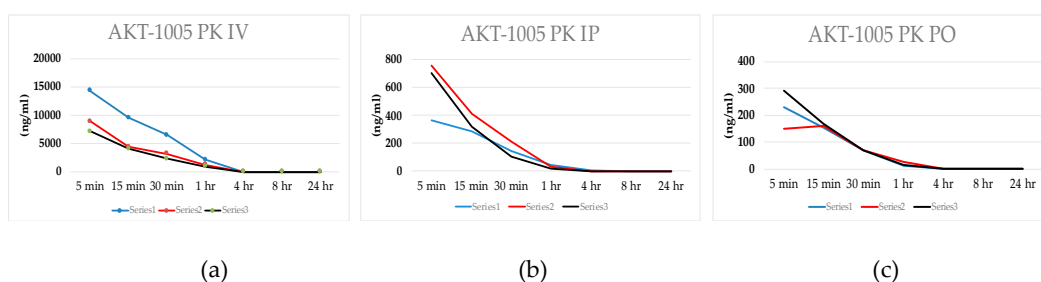

(a)

(b)

(c)

**Figure S2. Pharmacokinetic (PK) analysis of AKT-1005 (20 mg/kg) in non-pregnant female CD1 mice (n=3).** x-axis: time, y-axis: concentration of AKT-1005 (ng/ml). (a) Intravenous/IV, (b) intraperitoneal/IP and (c) per os/PO administration.

Supplemental Table S1.

| Parameter | IV        | IP      | PO      | Units     |
|-----------|-----------|---------|---------|-----------|
| Tmax      | 0.083     | 0.25    | 0.25    | hrs       |
| Cmax      | 10086.667 | 605.67  | 224.67  | ng/ mL    |
| Tlast     | 1         | 4       | 2       | hrs       |
| Clast     | 1463.333  | 2.51    | 18.7    | ng/ mL    |
| AUClast   | 3804.519  | 330.568 | 142.621 | ng/ mL*hr |
| AUMClast  | 1237.892  | 206.97  | 76.413  | ng/ mL*hr |
| MRTlast   | 0.325     | 0.626   | 0.536   | hrs       |
| Thalf     | 0.318     | 0.583   | 0.674   | hrs       |
| Tinf      | 4.571     | 4.547   | 4.032   | hrs       |
|           |           |         |         |           |

**Table S1. PK analysis and definitions:**

1. Cmax, Tmax and Cmax: Are the value and the time of maximum observed concentration, respectively. If the maximum concentration is not unique, the first maximum is used. For steady state data, the maximum value between the dosing intervals is considered. Cmax is the dose normalized maximum observed concentration.
2. Clast and Tlast: Are the last measurable positive concentration and the corresponding time, respectively.
3. AUClast: Is the area under the concentration vs. time curve from the first observed to last measurable concentration.
4. AUMClast: Is the first moment of the concentration vs. time curve from the first observed to last measurable concentration.
5. MRTlast: Is the mean residence time from the first observed to last measurable concentration.

Supplemental Figure S3.

| Sample Name | Timepoint | Length of treatment | TotConc AKT-1005 (ng/ml) |
|-------------|-----------|---------------------|--------------------------|
| M42         | Gd17      | 6 days              | 160                      |
| M45         | Gd17      | 6 days              | 60                       |
| M46         | Gd17      | 6 days              | 80                       |
| M48-CTL     | Gd17      | 6 days              | 0                        |
| M54         | Gd17      | 6 days              | 40                       |
| M58         | Gd17      | 6 days              | 120                      |
| M61         | Gd17      | 6 days              | 70                       |

**Figure S3.** Plasma levels of AKT-1005 were detected by Mass Spectrometry after 6 days of minipump treatment @20mg/kg/day in pregnant CD1 mice (n=6). Treatment started on gd11 and terminated at gd17. M48-CTL received vehicle instead of AKT--1005.
